# Supplementary material for: A Molecular Perspective on Colistin and Klebsiella pneumoniae: Mode of Action, Resistance Genetics, and Phenotypic Susceptibility
Source: MDPI journal article supplement (doi:10.3390/diagnostics11071165), 2021-06-25
Supplement: s1 [file s1]

**Supplementary Table S1** – List of the *mcr*-like gene families and alleles available at the NCBI AMR database and/or published, along with the GenBank accessions for the nucleotide and protein sequences found in *Klebsiella pneumoniae*.

| <i>mcr</i> -gene family | <i>mcr</i> - allelic variants | Reference of the nucleotide sequence | Reference of the protein sequence | Presence in <i>Klebsiella pneumoniae</i> |
|-------------------------|-------------------------------|--------------------------------------|-----------------------------------|------------------------------------------|
| <i>mcr-1</i>            | <i>mcr-1.1</i>                | NG_050417.1                          | WP_049589868.1                    | Present                                  |
|                         | <i>mcr-1.2</i>                | NG_051170.1                          | WP_065274078.1                    | Present                                  |
|                         | <i>mcr-1.3</i>                | NG_052861.1                          | WP_077064885.1                    | Absent                                   |
|                         | <i>mcr-1.4</i>                | NG_052664.1                          | WP_076611062.1                    | Absent                                   |
|                         | <i>mcr-1.5</i>                | NG_052663.1                          | WP_076611061.1                    | Absent                                   |
|                         | <i>mcr-1.6</i>                | NG_052893.1                          | WP_077248208.1                    | Absent                                   |
|                         | <i>mcr-1.7</i>                | NG_054678.1                          | WP_085562392.1                    | Absent                                   |
|                         | <i>mcr-1.8</i>                | NG_054697.1                          | WP_085562407.1                    | Absent                                   |
|                         | <i>mcr-1.9</i>                | NG_055582.1                          | WP_099982800.1                    | Absent                                   |
|                         | <i>mcr-1.10</i>               | NG_055583.1                          | WP_096807442.1                    | Absent                                   |
|                         | <i>mcr-1.11</i>               | NG_055784.2                          | WP_099982815.1                    | Absent                                   |
|                         | <i>mcr-1.12</i>               | NG_056412.1                          | WP_104009850.1                    | Absent                                   |
|                         | <i>mcr-1.13</i>               | NG_057466.1                          | WP_109545056.1                    | Absent                                   |
|                         | <i>mcr-1.14</i>               | NG_057460.1                          | WP_109545052.1                    | Present                                  |
|                         | <i>mcr-1.15</i>               | NG_061610.1                          | WP_116786830.1                    | Present                                  |
|                         | <i>mcr-1.16</i>               | NG_064787.1                          | WP_136512110.1                    | Absent                                   |
|                         | <i>mcr-1.17</i>               | NG_064788.1                          | WP_136512111.1                    | Absent                                   |
|                         | <i>mcr-1.18</i>               | NG_064789.1                          | WP_106743337.1                    | Absent                                   |
|                         | <i>mcr-1.19</i>               | NG_065449.1                          | WP_129336087.1                    | Absent                                   |
|                         | <i>mcr-1.20</i>               | NG_065450.1                          | WP_140423329.1                    | Absent                                   |
|                         | <i>mcr-1.21</i>               | NG_065451.1                          | WP_140423330.1                    | Absent                                   |
|                         | <i>mcr-1.22</i>               | NG_065944.1                          | WP_148044477.1                    | Absent                                   |
|                         | <i>mcr-1.23</i>               | NG_067235.1                          | WP_160164897.1                    | Absent                                   |
|                         | <i>mcr-1.24</i>               | NG_067236.1                          | WP_160164898.1                    | Absent                                   |
|                         | <i>mcr-1.25</i>               | NG_067237.1                          | WP_160164899.1                    | Absent                                   |
|                         | <i>mcr-1.26</i>               | NG_068217.1                          | WP_034169413.1                    | Absent                                   |
|                         | <i>mcr-1.27</i>               | NG_068218.1                          | WP_163397051.1                    | Absent                                   |
| <i>mcr-2</i>            | <i>mcr-2.1</i>                | NG_051171.1                          | WP_065419574.1                    | Present                                  |
|                         | <i>mcr-2.2</i>                | NG_055496.1                          | WP_078254299.1                    | Absent                                   |
|                         | <i>mcr-2.3</i>                | NG_065452.1                          | WP_094323230.1                    | Absent                                   |
| <i>mcr-3</i>            | <i>mcr-3.1</i>                | NG_055505.1                          | WP_039026394.1                    | Absent                                   |
|                         | <i>mcr-3.2</i>                | NG_055523.1                          | WP_094315354.1                    | Absent                                   |
|                         | <i>mcr-3.3</i>                | NG_055783.1                          | WP_099982814.1                    | Absent                                   |
|                         | <i>mcr-3.4</i>                | NG_055492.1                          | WP_065804663.1                    | Present                                  |
|                         | <i>mcr-3.5</i>                | NG_055782.1                          | WP_089613755.1                    | Absent                                   |
|                         | <i>mcr-3.6</i>                | NG_055660.1                          | WP_042649074.1                    | Absent                                   |
|                         | <i>mcr-3.7</i>                | NG_055661.1                          | WP_099156047.1                    | Absent                                   |
|                         | <i>mcr-3.8</i>                | NG_055662.1                          | WP_099156048.1                    | Absent                                   |
|                         | <i>mcr-3.9</i>                | NG_055663.1                          | WP_099156049.1                    | Absent                                   |
|                         | <i>mcr-3.10</i>               | NG_055799.1                          | WP_099982820.1                    | Absent                                   |
|                         | <i>mcr-3.11</i>               | NG_056184.1                          | WP_102607465.1                    | Absent                                   |
|                         | <i>mcr-3.12</i>               | NG_057484.1                          | WP_109545070.1                    | Absent                                   |
|                         | <i>mcr-3.13</i>               | NG_060514.1                          | WP_111273842.1                    | Absent                                   |

|               |                 |             |                |         |
|---------------|-----------------|-------------|----------------|---------|
|               | <i>mcr-3.14</i> | NG_060515.1 | WP_111273843.1 | Absent  |
|               | <i>mcr-3.15</i> | NG_060516.1 | WP_111273844.1 | Absent  |
|               | <i>mcr-3.16</i> | NG_060517.1 | WP_111273845.1 | Absent  |
|               | <i>mcr-3.17</i> | NG_060518.1 | WP_111273846.1 | Absent  |
|               | <i>mcr-3.18</i> | NG_060519.1 | WP_111273847.1 | Absent  |
|               | <i>mcr-3.19</i> | NG_055497.1 | WP_087879616.1 | Absent  |
|               | <i>mcr-3.20</i> | NG_055493.1 | WP_065801616.1 | Present |
|               | <i>mcr-3.21</i> | NG_065453.1 | WP_094312656.1 | Present |
|               | <i>mcr-3.22</i> | NG_060581.2 | WP_094308975.1 | Present |
|               | <i>mcr-3.23</i> | NG_060583.1 | WP_094313523.1 | Absent  |
|               | <i>mcr-3.24</i> | NG_060580.1 | WP_094321595.1 | Absent  |
|               | <i>mcr-3.25</i> | NG_060585.1 | WP_103252528.1 | Absent  |
|               | <i>mcr-3.26</i> | NG_065455.1 | WP_140423331.1 | Present |
|               | <i>mcr-3.27</i> | NG_064790.1 | WP_017778762.1 | Absent  |
|               | <i>mcr-3.28</i> | NG_066546.1 | WP_150823496.1 | Present |
|               | <i>mcr-3.29</i> | NG_064791.1 | WP_136512112.1 | Absent  |
|               | <i>mcr-3.30</i> | NG_065456.1 | WP_140423332.1 | Absent  |
| <i>mcr-4</i>  | <i>mcr-4.1</i>  | NG_057470.1 | WP_099156046.1 | Absent  |
|               | <i>mcr-4.2</i>  | NG_057471.1 | WP_109545058.1 | Absent  |
|               | <i>mcr-4.3</i>  | NG_057461.1 | WP_011638903.1 | Absent  |
|               | <i>mcr-4.4</i>  | NG_057465.1 | WP_109545055.1 | Absent  |
|               | <i>mcr-4.5</i>  | NG_057464.1 | WP_109545054.1 | Absent  |
|               | <i>mcr-4.6</i>  | NG_061608.1 | WP_116786828.1 | Absent  |
| <i>mcr-5</i>  | <i>mcr-5.1</i>  | NG_055658.1 | WP_053821788.1 | Absent  |
|               | <i>mcr-5.2</i>  | NG_057467.1 | WP_109545057.1 | Absent  |
|               | <i>mcr-5.3</i>  | NG_061405.1 | WP_114699278.1 | Absent  |
|               | <i>mcr-5.4</i>  | NG_065945.1 | WP_148044478.1 | Absent  |
| <i>mcr-6</i>  | <i>mcr-6.1</i>  | NG_055781.1 | WP_099982813.1 | Absent  |
| <i>mcr-7</i>  | <i>mcr-7.1</i>  | NG_056413.1 | WP_104009851.1 | Present |
| <i>mcr-8</i>  | <i>mcr-8.1</i>  | NG_061399.1 | WP_114699275.1 | Present |
|               | <i>mcr-8.2</i>  | NG_061627.1 | WP_072310976.1 | Present |
|               | <i>mcr-8.3</i>  | NG_066547.1 | WP_150823497.1 | Present |
| <i>mcr-9</i>  | <i>mcr-9.1</i>  | NG_064792.1 | WP_001572373.1 | Absent  |
| <i>mcr-10</i> | <i>mcr-10.1</i> | NG_066767.1 | WP_023332837.1 | Absent  |
